# Supplementary material for: Cycling stability of Li metal in a mixed carbonate–ionic liquid electrolyte for lithium secondary batteries
Source: Royal Society of Chemistry journal article supplement (doi:10.1039/c7ra03135a), 2017-01-01
Supplement: c7ra03135a1.pdf [file c7ra03135a1.pdf]

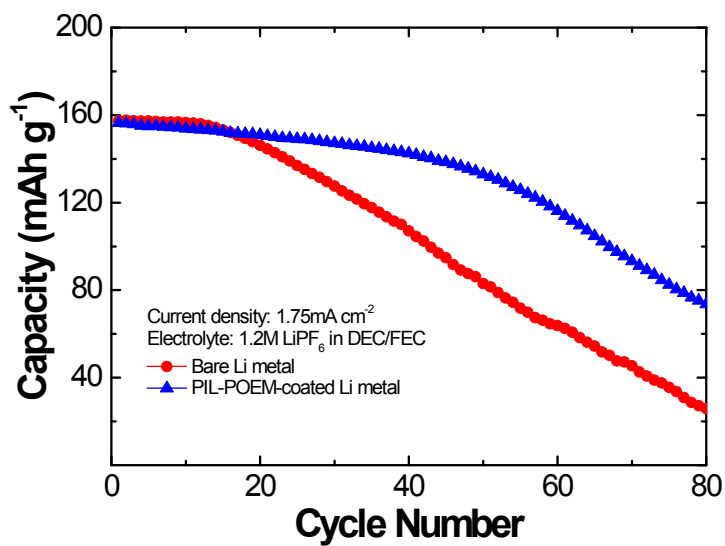

**Supplementary Fig. 1.** Cycling performance of coin-type cells. Discharging capacity vs. cycle number in carbonate for LCO/Li coin cells containing a bare Li metal anode and a PIL-POEM-coated Li metal anode.
